# Supplementary material for: Non-invasive diagnostic test for lung cancer using biospectroscopy and variable selection techniques in saliva samples
Source: Royal Society of Chemistry journal article supplement (doi:10.1039/d4an00726c), 2024-01-01
Supplement: d4an00726c1.pdf [file d4an00726c1.pdf]

## **Electronic Supplementary Information**

### **Noninvasive diagnostic test for lung cancer using biospectroscopy and variable selection techniques in saliva samples**

Camilo L.M. Morais<sup>1,2</sup>, Kássio M.G. Lima<sup>1</sup>, Andrew W Dickinson<sup>3</sup>, Tarek Saba<sup>3</sup>, Thomas Bongers<sup>3</sup>, Maneesh N Singh<sup>4,5</sup>, Francis L Martin<sup>3,4,\*</sup>, Danielle Bury<sup>3,\*</sup>

<sup>1</sup> *Biological Chemistry and Chemometrics, Institute of Chemistry, Federal University of Rio Grande do Norte, Natal 59072-970, Brazil*

<sup>2</sup> *Center for Education, Science and Technology of the Inhamuns Region, State University of Ceará, Tauá 63660-000, Brazil*

<sup>3</sup> *Department of Cellular Pathology, Blackpool Teaching Hospitals NHS Foundation Trust, Whinney Heys Road, Blackpool FY3 8NR, UK*

<sup>4</sup> *Biocel UK Ltd., Hull HU10 6TS, UK*

<sup>5</sup> *Chesterfield Royal Hospital, Chesterfield Road, Calow, Chesterfield S44 5BL, UK*

\* **Corresponding authors:** [francis.martin2@nhs.net](mailto:francis.martin2@nhs.net) (F.L.M. ); [danielle.bury@nhs.net](mailto:danielle.bury@nhs.net) (D.B.)

**Table S1:** Age and gender for the different groups (lung cancer and controls). *P*-values calculated based on an ANOVA test.

| Patient Characteristics              | Lung cancer (LC) (N = 56) | Controls (N = 1888)    | <i>P</i> -value     |
|--------------------------------------|---------------------------|------------------------|---------------------|
| <b>Age</b>                           |                           |                        | $8 \times 10^{-5}$  |
| Mean $\pm$ SD (range)                | 69.8 $\pm$ 5.2 (57–76)    | 67.1 $\pm$ 5.1 (56–77) |                     |
| <b>Gender, n/N (%)</b>               |                           |                        | 0.5894              |
| Female                               | 21 (37.5)                 | 776 (41.1)             |                     |
| Male                                 | 35 (62.5)                 | 1112 (58.9)            |                     |
| <b>Others comorbidities, n/N (%)</b> |                           |                        | 0.0141              |
| Prostate cancer                      | --                        | 30 (1.589)             | 0.3420              |
| Breast cancer                        | --                        | 29 (1.536)             | 0.3503              |
| Bladder cancer                       | --                        | 14 (0.741)             | 0.5181              |
| Squamous cell carcinoma (skin)       | --                        | 13 (0.689)             | 0.5335              |
| Colorectal cancer                    | --                        | 7 (0.371)              | 0.6482              |
| Melanoma                             | --                        | 4 (0.212)              | 0.7304              |
| Cervical cancer                      | --                        | 3 (0.159)              | 0.7654              |
| CLL                                  | --                        | 3 (0.159)              | 0.7654              |
| Ovarian cancer                       | --                        | 2 (0.106)              | 0.8076              |
| Endometrial cancer                   | --                        | 2 (0.106)              | 0.8076              |
| CMML                                 | --                        | 2 (0.106)              | 0.8076              |
| Other cancers                        | --                        | 7 (0.371)              | 0.6482              |
| Other systematic diseases            | --                        | 68 (3.602)             | 0.1484              |
| Healthy controls                     | --                        | 1704 (90.254)          | $8 \times 10^{-10}$ |

COPD: Chronic obstructive pulmonary disease; CLL: Chronic lymphocytic leukemia;  
CMML: Chronic myelomonocytic leukaemia.

**Table S2:** Classification performance by LDA- and QDA-based models to distinguish between lung cancer and controls in the training set (70% of data).

| MODEL   | PARAMETERS                         | TRAINING |             |             |         |         |
|---------|------------------------------------|----------|-------------|-------------|---------|---------|
|         |                                    | ACCURACY | SENSITIVITY | SPECIFICITY | F-SCORE | G-SCORE |
| PCA-LDA | 10 PCs (97.64% explained variance) | 0.700    | 0.667       | 0.701       | 0.683   | 0.683   |
| PCA-QDA | 10 PCs (97.64% explained variance) | 0.964    | 0.692       | 0.972       | 0.809   | 0.820   |
| SPA-LDA | 4 selected wavenumbers             | 0.737    | 0.513       | 0.744       | 0.607   | 0.618   |
| SPA-QDA | 4 selected wavenumbers             | 0.979    | 0.923       | 0.980       | 0.951   | 0.951   |
| GA-LDA  | 3 selected wavenumbers             | 0.737    | 0.590       | 0.741       | 0.657   | 0.661   |
| GA-QDA  | 3 selected wavenumbers             | 0.979    | 0.923       | 0.981       | 0.951   | 0.952   |

**Table S3:** Classification performance by LDA- and QDA-based models to distinguish between lung cancer and controls in the test set (30% of data).

| MODEL   | PARAMETERS                         | TEST     |             |             |         |         |
|---------|------------------------------------|----------|-------------|-------------|---------|---------|
|         |                                    | ACCURACY | SENSITIVITY | SPECIFICITY | F-SCORE | G-SCORE |
| PCA-LDA | 10 PCs (97.64% explained variance) | 0.789    | 0.353       | 0.802       | 0.490   | 0.532   |
| PCA-QDA | 10 PCs (97.64% explained variance) | 0.985    | 0.941       | 0.986       | 0.963   | 0.963   |
| SPA-LDA | 4 selected wavenumbers             | 0.793    | 0.471       | 0.802       | 0.593   | 0.614   |
| SPA-QDA | 4 selected wavenumbers             | 0.988    | 0.941       | 0.989       | 0.965   | 0.965   |
| GA-LDA  | 3 selected wavenumbers             | 0.935    | 0.294       | 0.954       | 0.450   | 0.530   |
| GA-QDA  | 3 selected wavenumbers             | 0.991    | 1.000       | 0.991       | 0.996   | 0.996   |
